# Supplementary material for: Adenosine-independent regulation of the sleep–wake cycle by astrocyte activity
Source: PubMed Central journal article supplement (PMC9902472; doi:10.1038/s41421-022-00498-9), 2023-02-07
Supplement: 41421_2022_498_MOESM1_ESM.pdf [file 41421_2022_498_MOESM1_ESM.pdf]

## Supplementary Information for

# Adenosine-Independent Regulation of the Sleep-Wake Cycle by Astrocyte Activity

Wanling Peng<sup>1,2,9\*</sup>, Xiaotong Liu<sup>1,2,9</sup>, Guofen Ma<sup>4,5,9</sup>, Zhaofa Wu<sup>6,8</sup>, Ziyue Wang<sup>5</sup>, Xiang Fei<sup>1,2</sup>, Meiling Qin<sup>1</sup>, Lizhao Wang<sup>5</sup>, Yulong Li<sup>6,7,8</sup>, Siyu Zhang<sup>4,5\*</sup>, and Min Xu<sup>1,2,3\*</sup>

\*Correspondence: [mxu@ion.ac.cn](mailto:mxu@ion.ac.cn); or [zhang\\_siyu@sjtu.edu.cn](mailto:zhang_siyu@sjtu.edu.cn); or [wlpeng@ion.ac.cn](mailto:wlpeng@ion.ac.cn)

**This PDF file includes:**

Figures S1 to S19

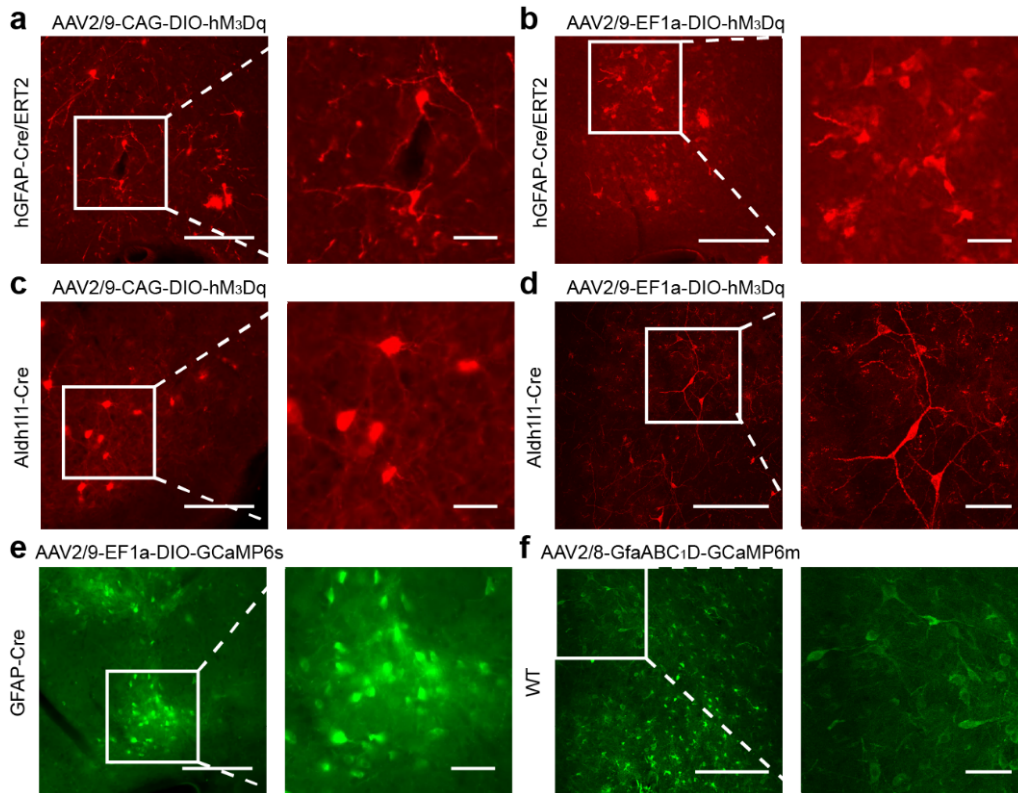

**Supplementary Fig. S1 Multiple methods cause non-specific leaky expression in BF neurons (related to Fig. 1)**

**a-b** Fluorescence images showing apparent leaky expression in BF neurons in hGFAP-Cre/ERT2 mice. **c-e** Same as **a** and **b**, except that experiments were performed using other transgenic mouse lines. **f** Fluorescence images showing apparent leaky expression in BF neurons after injecting AAV2/8-GfaABC<sub>1</sub>D-GCaMP6m into WT mice. Scale bars represent 200 μm (left) and 50 μm (right) in all panels.

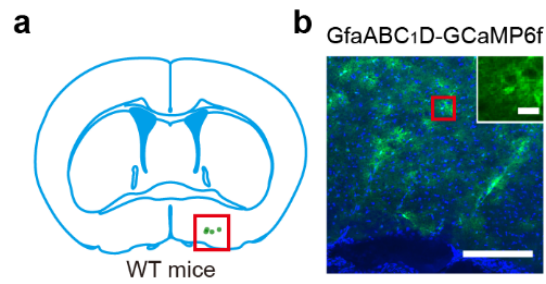

**Supplementary Fig. S2 Histological verification of optic fiber position (related to Fig. 2)**

**a** Schematic diagram summarizing placement of the optical fiber in mice expressing GfaABC<sub>1</sub>D-GCaMP. **b** Fluorescence image of the BF showing the expression of the GfaABC<sub>1</sub>D-GCaMP. Scale bars represent 200  $\mu$ m and 20  $\mu$ m (inset), respectively.

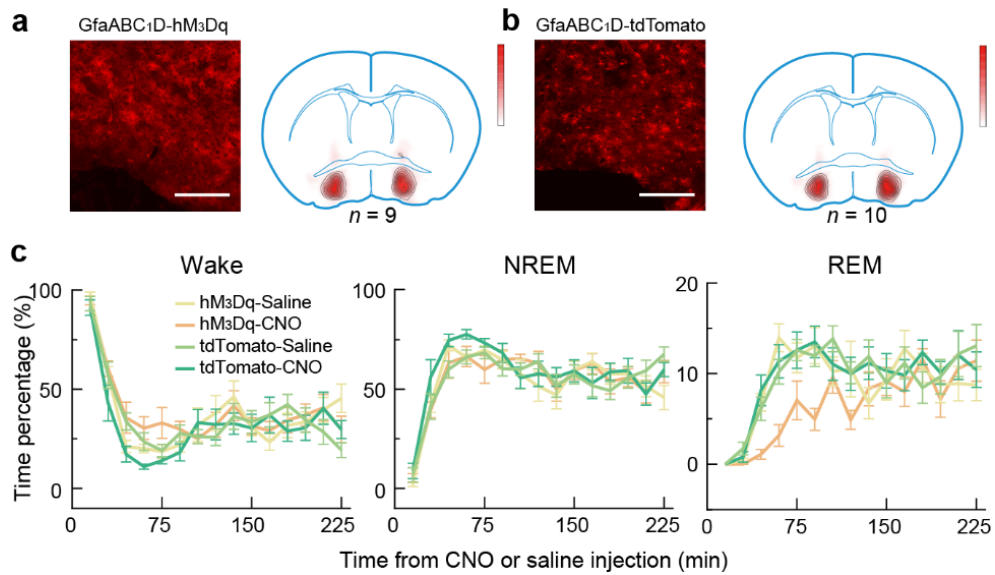

**Supplementary Fig. S3 Sleep-wake modulation by chemogenetic-induced  $\text{Ca}^{2+}$  elevation in BF astrocytes in WT mice (related to Fig. 3)**

**a** Fluorescence image of the BF showing the expression of the GfaABC1D-hM3Dq in the BF (left) and the normalized expression density of GfaABC1D-hM3Dq from 9 mice (right). Scale, 200  $\mu\text{m}$ . **b** Same as **a**, except that GfaABC1D-tdTomato was injected. tdTomato group,  $n = 10$  mice. **c** Time percentage of each brain state after the injection of CNO or saline in hM3Dq- or tdTomato-expressing mice.

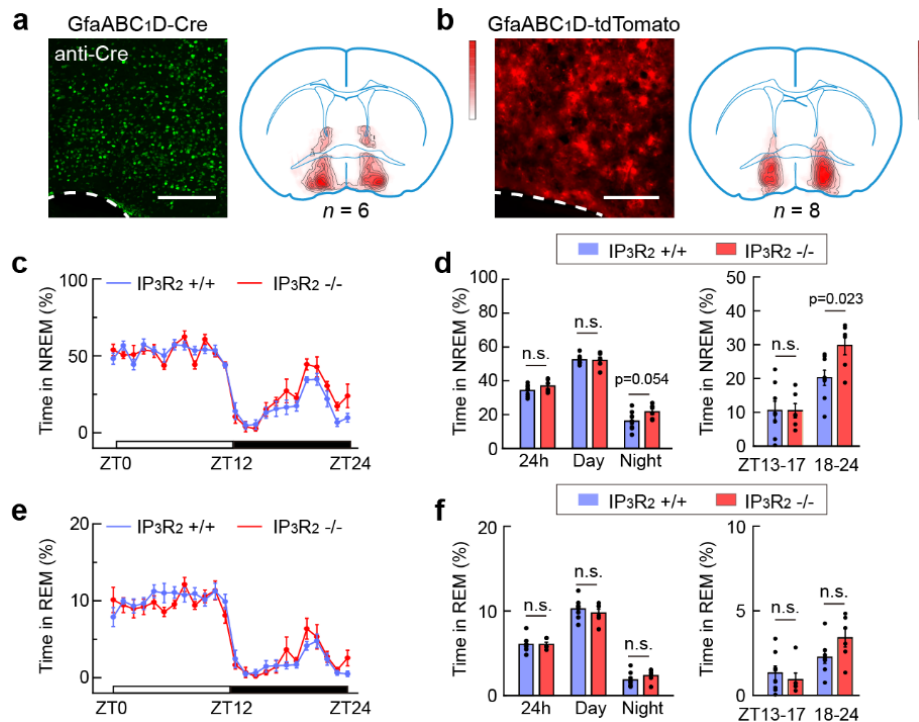

**Supplementary Fig. S4 Sleep-wake modulation after  $IP_3R_2$  knockout in BF astrocytes (related to Fig. 3)**

**a** Fluorescence image of the BF showing the expression of the GfaABC1D- Cre in the BF (left) and the normalized expression density of GfaABC1D-Cre from 6 mice (right). Scale, 200  $\mu$ m. **b** Same as **a**, except that GfaABC1D-tdTomato was injected. **c** Circadian variation of NREM sleep in the two groups of mice. Cre group:  $n = 6$  mice; tdTomato group:  $n = 8$  mice. **d** Time percentage of NREM sleep in the entire 24-hour, during the day, during the night, and the early (ZT13-17) and late phase (18-24) of the night. 24h,  $P = 0.20$ ; Day,  $P = 0.90$ ; Night,  $P = 0.054$ ; ZT13-17,  $P = 0.98$ ; ZT18-24,  $*P = 0.023$ ; Student's  $t$ -test. **e-f** Same as **c-d**, respectively, except that data were for REM sleep. In **f**, 24h,  $P = 0.99$ , Student's  $t$ -test; Day,  $P = 0.45$ , Student's  $t$ -test; Night,  $P = 0.27$ ; ZT13-17,  $P = 0.64$ , Wilcoxon rank-sum test; ZT18-24,  $P = 0.11$ , Student's  $t$ -test .

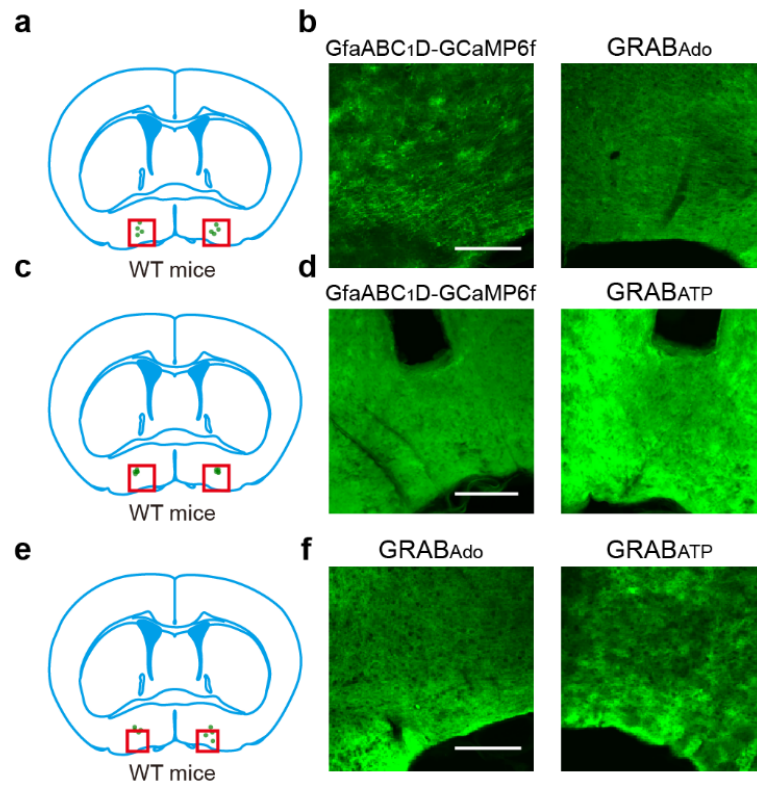

**Supplementary Fig. S5 Histological verification of optical fiber position (related to Fig. 4)**

**a** Schematic diagram summarizing placement of the optical fiber in Fig. 4**a-e**. **b** Fluorescence image of the BF showing the expression of the GfaABC<sub>1</sub>D-GCaMP and hSyn-GRAB<sub>Ado1.0</sub>. **c-f** Same as **a** and **b**, except that data were related to experiments in Fig. 4**f-j**, Fig. 4**k-o**. Scale bars represent 200 μm in all images.

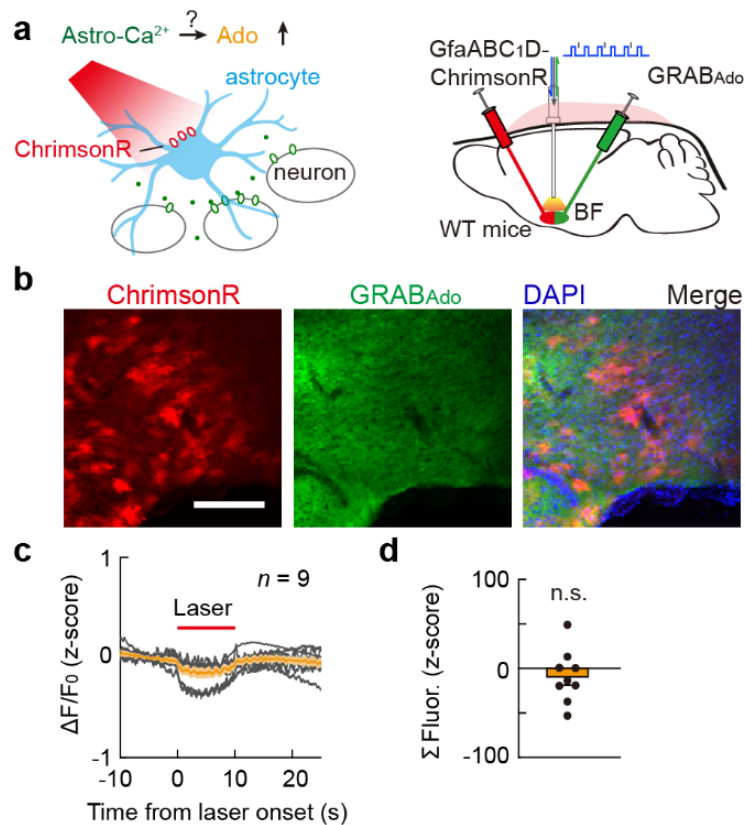

**Supplementary Fig. S6 Optogenetically evoked astrocyte  $\text{Ca}^{2+}$**

**elevation causes no detectable adenosine increase (related to Fig. 4)**

**a** Schematic of experiment. Fiber photometry recording of optogenetic stimulation-induced adenosine release by astrocytes. **b** Fluorescence images showing the expression of the GfaABC1D-ChrimsonR and GRABAdo in the BF. AAVs expressing GfaABC1D-ChrimsonR (AAV5-GfaABC1D-ChrimsonR) and GRABAdo (AAV9-hSyn-GRABAdo1.0) were injected into the BF. Scale, 200  $\mu\text{m}$ . **c** Laser (638 nm laser, 10 mW, 10 ms/pulse, 10 Hz for 10s)-evoked GRABAdo signals.  $n = 9$  mice. The red bar indicates the laser train. **d** Quantification of laser-evoked adenosine signals in **c**. Integrated signal area ( $P = 0.39$ , Student's  $t$ -test).

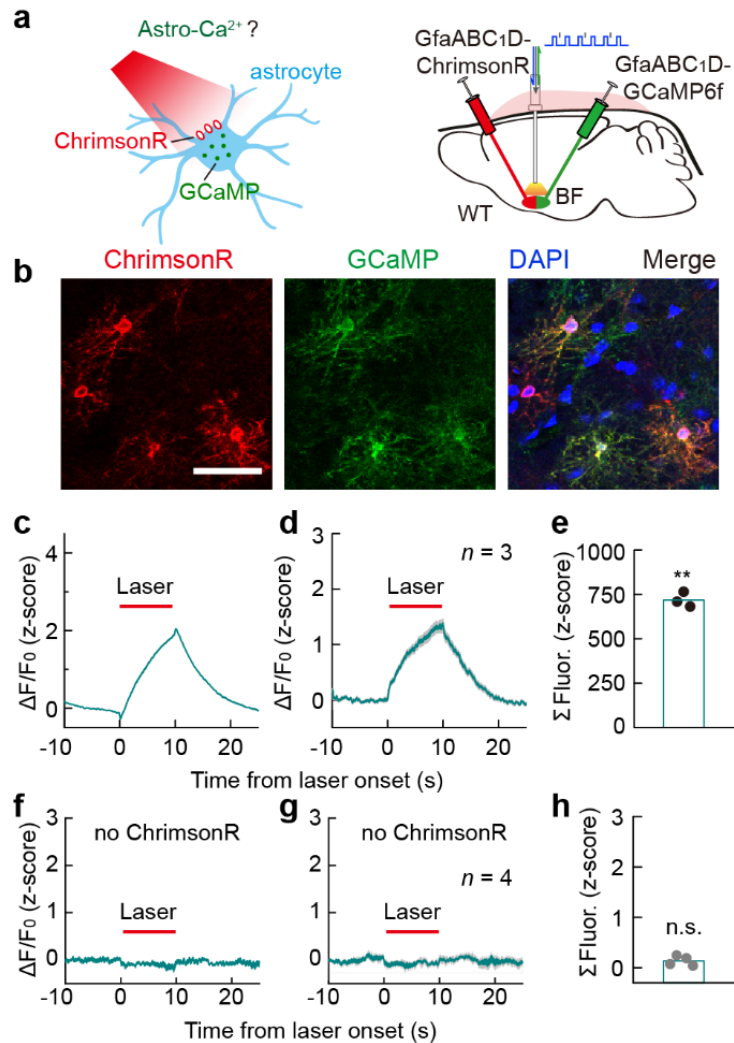

**Supplementary Fig. S7 Optogenetic stimulation induces prominent astrocyte  $\text{Ca}^{2+}$  elevation (related to Fig. 4)**

**a** Optogenetic stimulation was used to induce  $\text{Ca}^{2+}$  elevation in astrocytes. AAVs expressing GfaABC<sub>1</sub>D-ChrimsonR (AAV5-GfaABC<sub>1</sub>D-ChrimsonR) and GfaABC<sub>1</sub>D-GCaMP (AAV5-GfaABC<sub>1</sub>D-GCaMP6f) were injected into the BF. **b** Fluorescence images showing the expression of the GfaABC<sub>1</sub>D-ChrimsonR and GfaABC<sub>1</sub>D-GCaMP in the BF. Scale, 40  $\mu\text{m}$ . **c** Laser (638 nm laser, 2 mW, 10 ms/pulse, 10 Hz for 10 s)-evoked GCaMP signals in an example experiment. The red bar indicates the laser train. **d** Group summary of laser-evoked GCaMP signals.  $n = 3$  mice. **e** Quantification of laser-evoked GCaMP signals in **d**. Integrated signal area (\*\* $P = 0.0011$ , Student's  $t$ -test). **f-h** Same as **c-e**, except that laser stimulation was applied to mice injected with AAV5-GfaABC<sub>1</sub>D-



GCaMP6f only.  $P = 0.79$ , Student's  $t$ -test. Laser stimulation without ChrimsonR caused no significant change in the GCaMP signal. This experiment was used to control the non-specific effect of the laser.

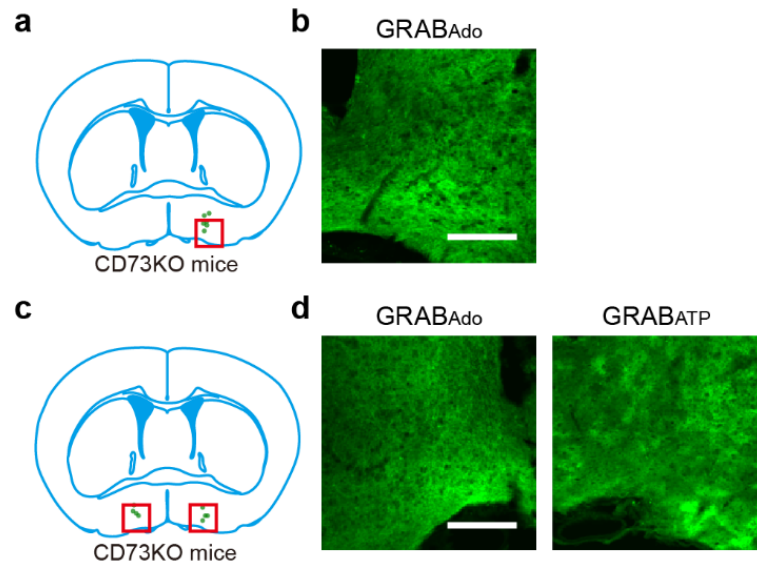

**Supplementary Fig. S8 Histological verification of optical fiber position (related to Fig. 5)**

**a** Schematic diagram summarizing placement of the optical fiber in Fig. 5**a-b**. **b** Fluorescence image of the BF showing the expression of the hSyn-GRAB<sub>Ado1.0</sub>. **c-d** Same as **a** and **b**, except that data were related to experiments in Fig. 5**c-g**. Scale bars represent 200  $\mu$ m in all images.

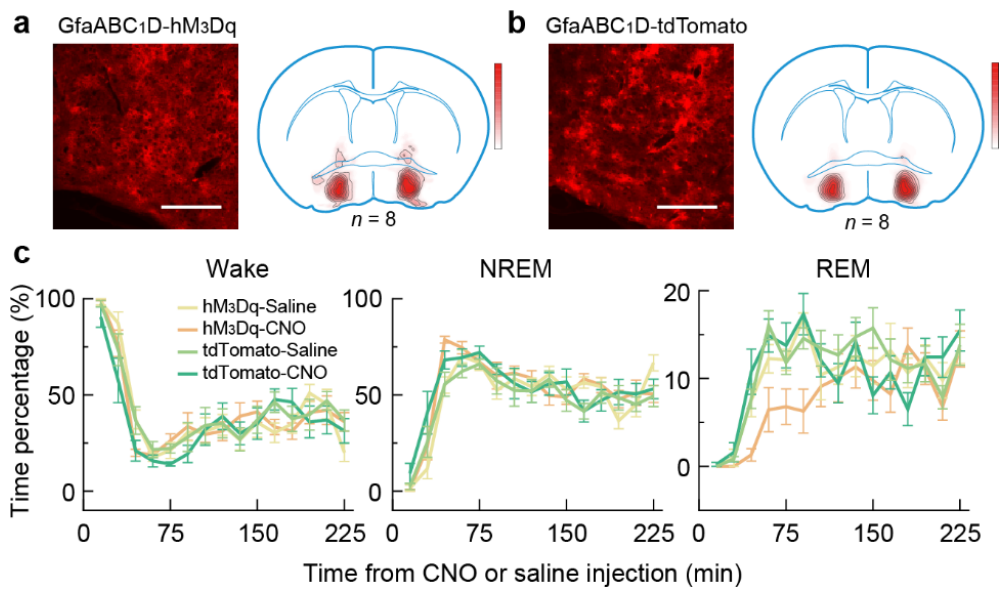

**Supplementary Fig. S9 Sleep-wake modulation by chemogenetic-induced  $\text{Ca}^{2+}$  elevation in BF astrocytes in CD73KO mice (related to Fig. 5)**

Same as Supplementary Fig. S3 except that experiments were performed using CD73KO mice. In a-b, scale bars = 200  $\mu\text{m}$ . hM3Dq group,  $n = 8$  mice; tdTomato group,  $n = 8$  mice.

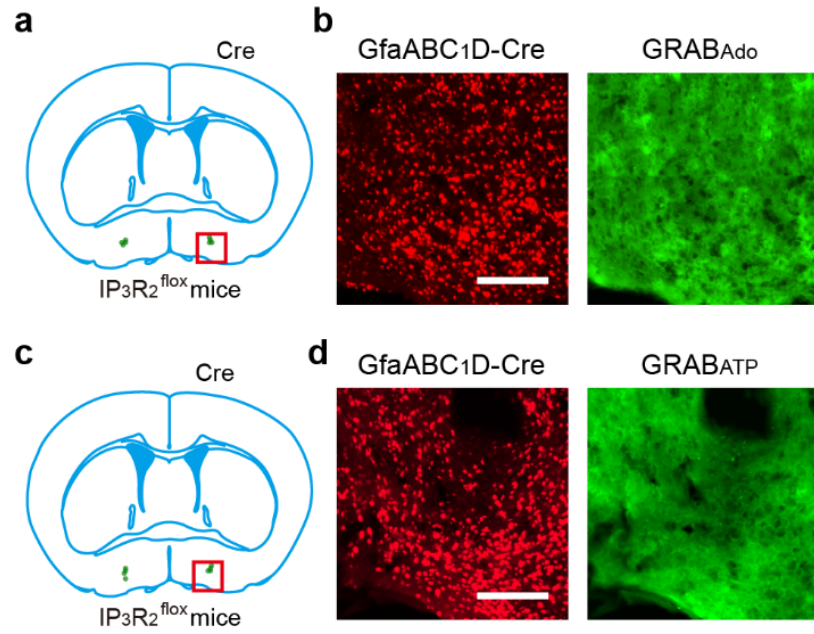

**Supplementary Fig. S10 Histological verification of optic fiber position (related to Fig. 6)**

**a** Schematic diagram summarizing placement of the optical fiber in Fig. 6a-c. **b** Fluorescence image of the BF showing the expression of the GfaABC1D-Cre and GfaABC1D-GRABAdo1.0. **c-d** Same as **a** and **b**, except that data were related to experiments in Fig. 6d-f. Scale bars represent 200  $\mu m$ .

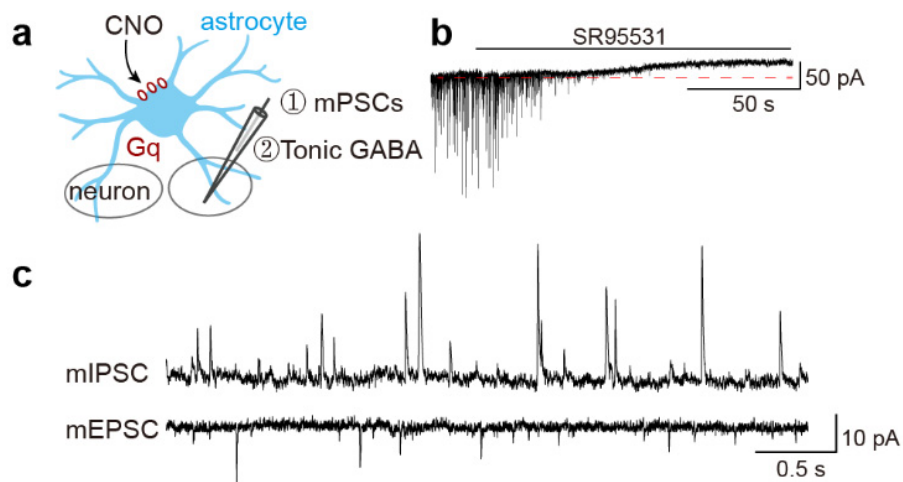

**Supplementary Fig. S11 Brain slice recordings of neural network modulation induced by astrocyte activity (related to Fig. 7)**

**a** Schematic diagram of brain slice recording. **b** Example recording of tonic GABA current. **c** Example recordings of mIPSCs (up) and mEPSCs.

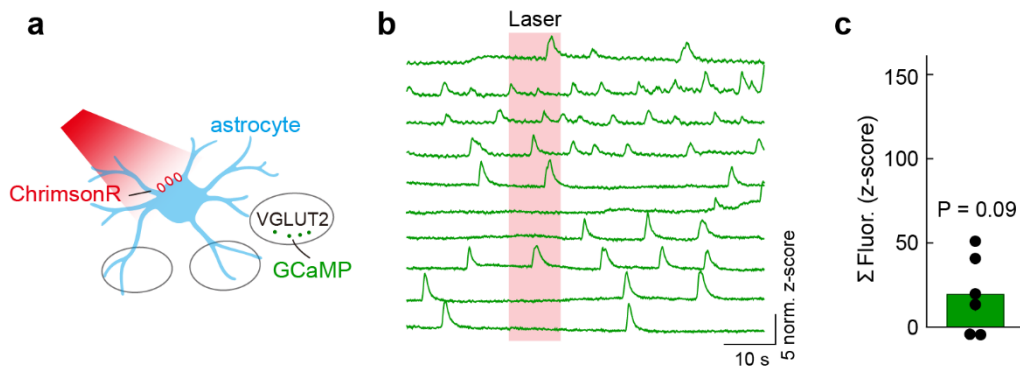

**Supplementary Fig. S12 Optogenetically evoked astrocyte  $\text{Ca}^{2+}$  elevation causes no detectable  $\text{Ca}^{2+}$  increase in VGLUT2 $^{+}$  neurons (related to Fig. 7)**

**a** Schematic of experiment. We activated BF astrocytes (expressing ChrimsonR) using optogenetic stimulation (638 nm laser, 10 mW, 10 ms/pulse, 10 Hz for 10s) and recorded  $\text{Ca}^{2+}$  activity of BF glutamatergic neurons (expressing GCaMP). **b** Example recording showing the  $\text{Ca}^{2+}$  activity of BF glutamatergic neurons during laser application (red shading). **c** Quantification of laser-evoked  $\text{Ca}^{2+}$  activity of BF glutamatergic neurons during laser period. Integrated signal area ( $P = 0.09$ , Student's  $t$ -test).  $n = 6$  sessions from 4 mice.

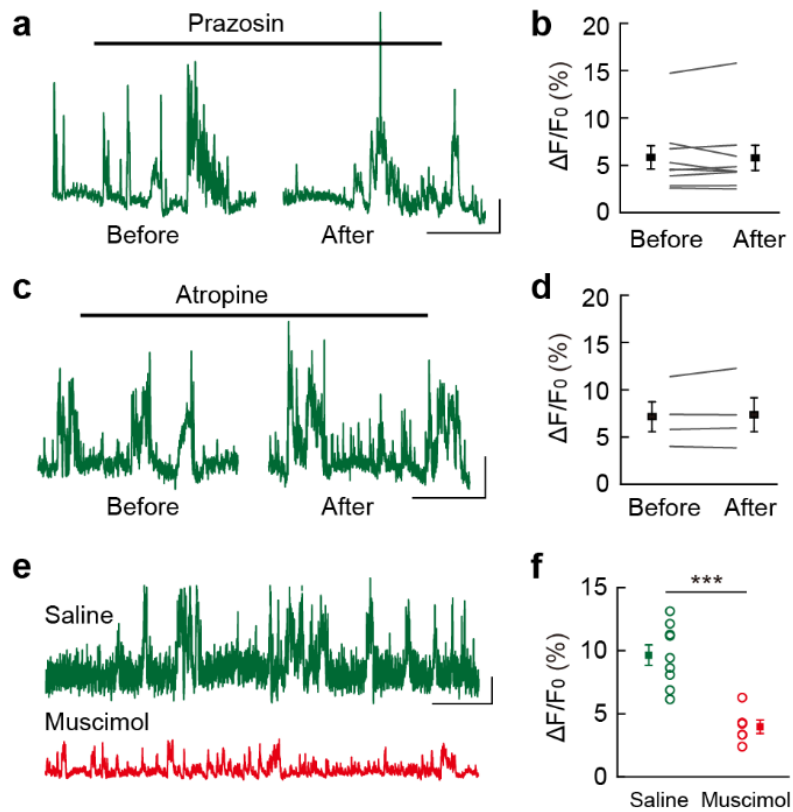

**Supplementary Fig. S13 Astrocyte  $\text{Ca}^{2+}$  elevation in the BF depends on local neuronal activity (related to Fig. 7)**

**a** Example recording of astrocyte  $\text{Ca}^{2+}$  signals before and after injection of prazosin (i.p.). Scale, 1000 s and 10%. **b** Quantification of astrocyte  $\text{Ca}^{2+}$  signals before and after prazosin injection.  $n = 9$ ,  $P = 0.91$ , Wilcoxon signed-rank test. **c-d** Same as **a** and **b**, respectively, except that atropine was injected.  $n = 4$ ,  $P = 0.43$ , Paired  $t$ -test. **e** Example recording of astrocyte  $\text{Ca}^{2+}$  signals after infusion of muscimol (200 ng) or saline into the BF. Scale, 1000 s and 10%. **f** Quantification of astrocyte  $\text{Ca}^{2+}$  signals after infusion of muscimol or saline into the BF.  $n = 6$  and  $9$  for the muscimol and saline group, respectively.  $***P < 0.001$ , Student's  $t$ -test.

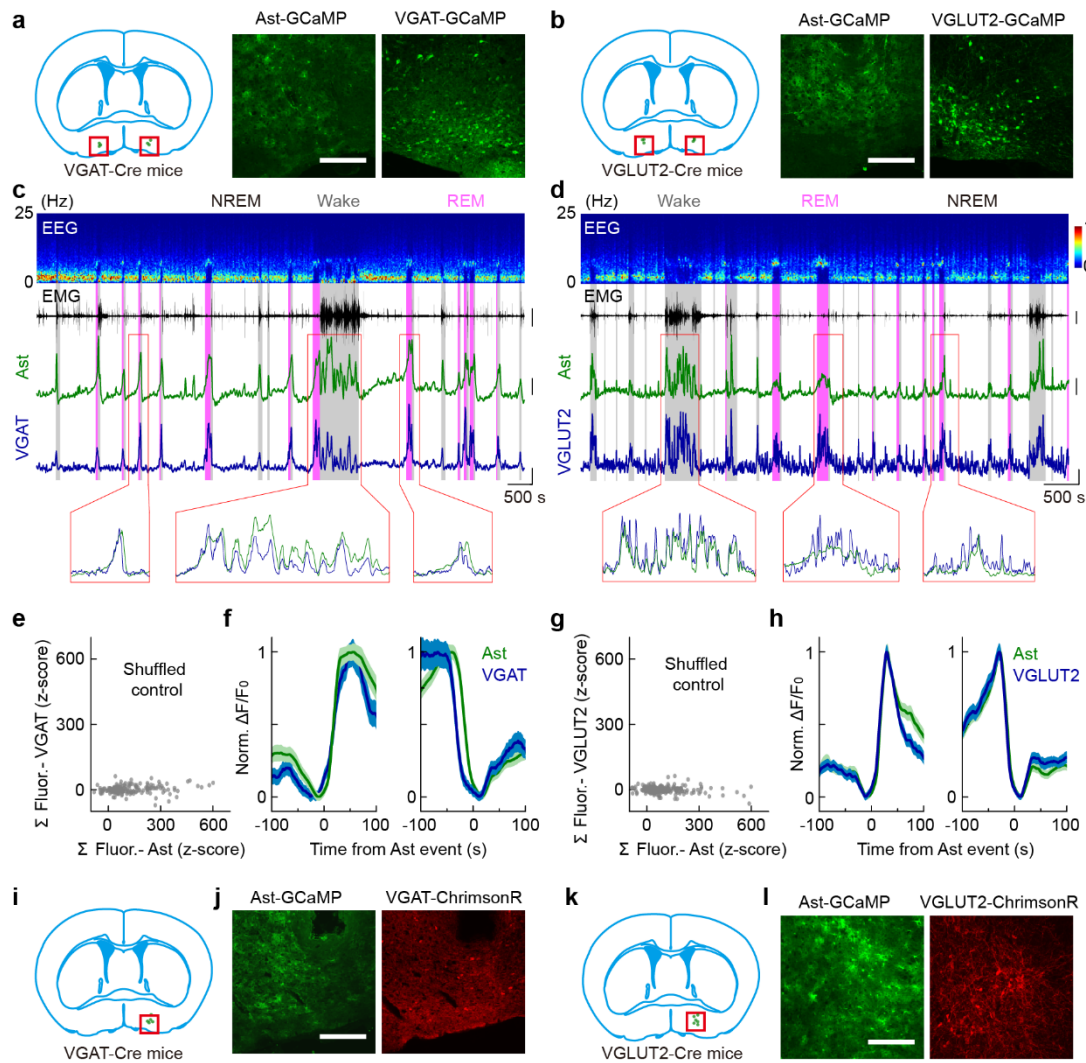

**Supplementary Fig. S14 Cell type-specific neuromodulation of astrocyte  $\text{Ca}^{2+}$  elevation in the BF (related to Fig. 7)**

**a** Schematic diagram summarizing the optical fiber placement in mice expressing GfaABC<sub>1</sub>D-GCaMP and DIO-GCaMP in the BF of VGAT-Cre mice (left), and fluorescence images of the BF (red boxes in coronal diagram) showing the expression of the GfaABC<sub>1</sub>D-GCaMP and DIO-GCaMP. Scale, 200  $\mu\text{m}$ . **b** Same as **a**, except that experiments were performed in VGLUT2-Cre mice. **c** Top to bottom, EEG power spectrogram, EMG (scale, 1 mV), GCaMP fluorescence of astrocytes in the BF (scale, 1 z-score), and GCaMP fluorescence of the BF VGAT+ neurons (scale, 1 z-score). **d** Same as **c**, except that recording was from BF VGLUT2+ neurons. **e** Correlation between the size of GCaMP events from BF astrocytes and BF VGAT+ neurons. Signals from



BF VGAT+ neurons were temporally shuffled randomly. Pearson's  $r = -0.13$ . **f** Time course of the GCaMP events from BF astrocytes and BF VGAT+ neurons aligned to the onset (left) or offset (right) of the GCaMP events from BF astrocytes. **g-h** Same as **e** and **f**, respectively, except that GCaMP events from BF astrocytes and BF VGLUT2+ neurons were compared. Pearson's  $r = 0.10$  in **g**. **i** Schematic diagram summarizing the optical fiber placement in VGAT-Cre mice expressing DIO-ChrimsonR and GfaABC<sub>1</sub>D-GCaMP. **j** Fluorescence images of the BF (red box in coronal diagram) showing the expression of the DIO-ChrimsonR and GfaABC<sub>1</sub>D-GCaMP. Scale, 200  $\mu\text{m}$ . **k-l** Same as **i** and **j**, respectively, except that experiments were performed in VGLUT2-Cre mice.

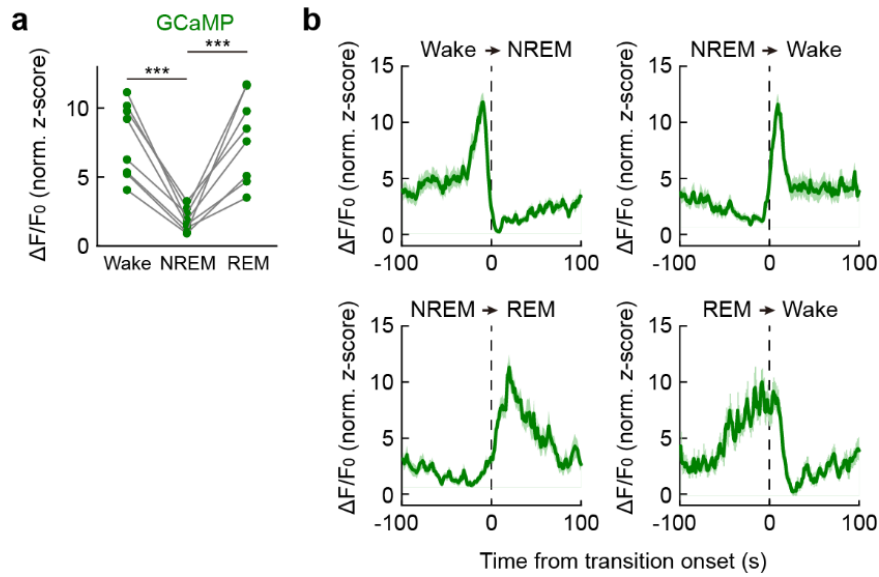

**Supplementary Fig. S15 Brain state-dependent astrocyte  $\text{Ca}^{2+}$  activity in the LC/SLD during the sleep-wake cycle (related to Fig. 8)**

**a** GCaMP fluorescence in different brain states. Each line represents data from one recording.  $n = 8$  sessions from 3 mice; Wake vs. NREM:  $***P < 0.001$ ; REM vs. NREM:  $***P < 0.001$ ; Paired  $t$ -test. **b** GCaMP signal during brain state transitions. The vertical dashed lines represent the transition time.  $n = 95, 70, 71,$  and  $46$  events (in 3 mice) for ‘Wake to NREM’, ‘NREM to Wake’, ‘NREM to REM’, and ‘REM to Wake’, respectively.

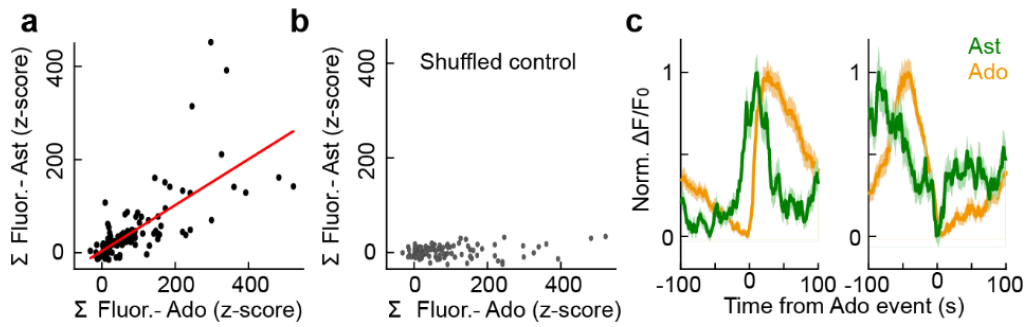

**Supplementary Fig. S16 Astrocyte Ca<sup>2+</sup> elevation in the LC/SLD is highly correlated with the dynamics of extracellular adenosine (related to Fig. 8)**

**a** Correlation between the size of GCaMP and GRAB<sub>Ado</sub> events. The red line represents a linear fit.  $n = 130$  events from 8 recordings in 3 mice. Pearson's  $r = 0.72$ ,  $***P < 0.001$ . **b** Same as in **c** after the GCaMP signal was randomly shuffled. Pearson's  $r = 0.23$ . **c** Time course of the GCaMP and GRAB<sub>Ado</sub> signal aligned to the onset (left) or offset (right) of the GRAB<sub>Ado</sub> events.

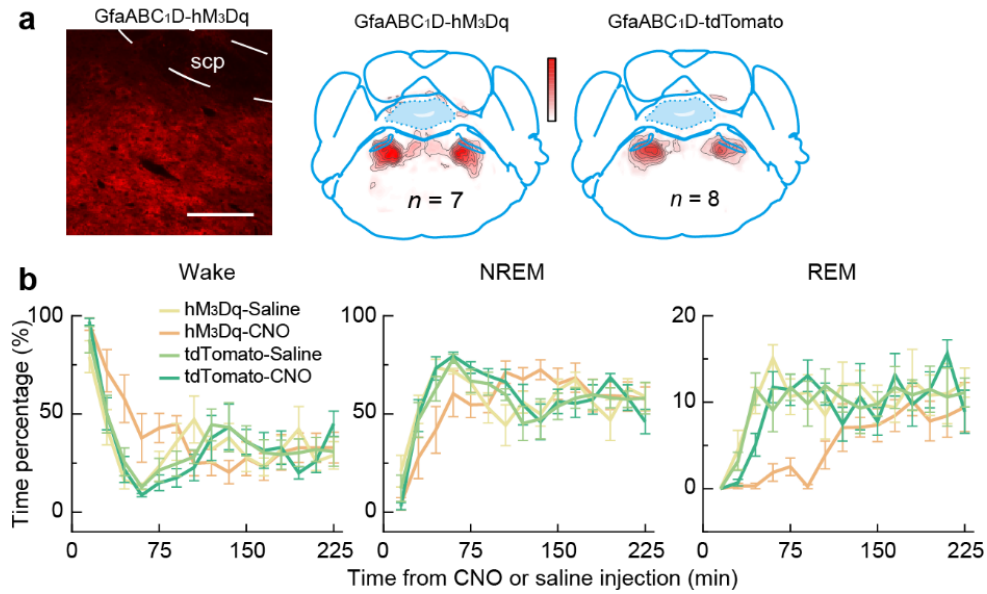

**Supplementary Fig. S17 Sleep-wake modulation by chemogenetic-induced  $ca^{2+}$  elevation in LC/SLD astrocytes in WT mice (related to Fig.8)**

Same as Supplementary information **Fig. S3** except that experiments were performed in LC/SLD. In **a**, scale bar = 200  $\mu$ m. hM3Dq group,  $n = 7$  mice; tdTomato group,  $n = 8$  mice.

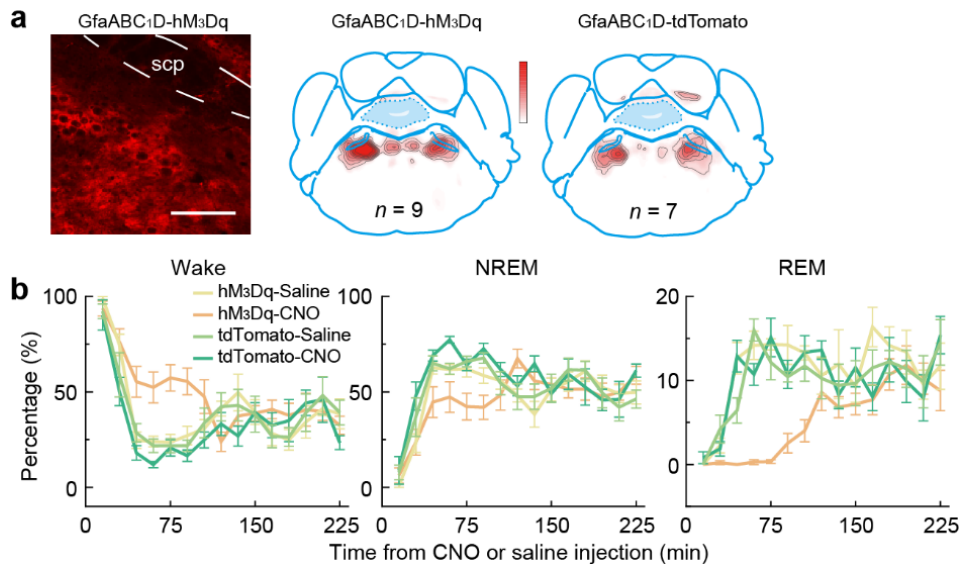

**Supplementary Fig. S18 Sleep-Wake modulation by chemogenetic-induced Ca<sup>2+</sup> elevation in LC/SLD astrocytes in CD73KO mice (related to Fig. 8)**

Same as Supplementary information **Fig. S17** except that experiments were performed using CD73KO. In **a**, scale bar = 200 μm. hM<sub>3</sub>Dq group, *n* = 9 mice; tdTomato group, *n* = 7 mice.

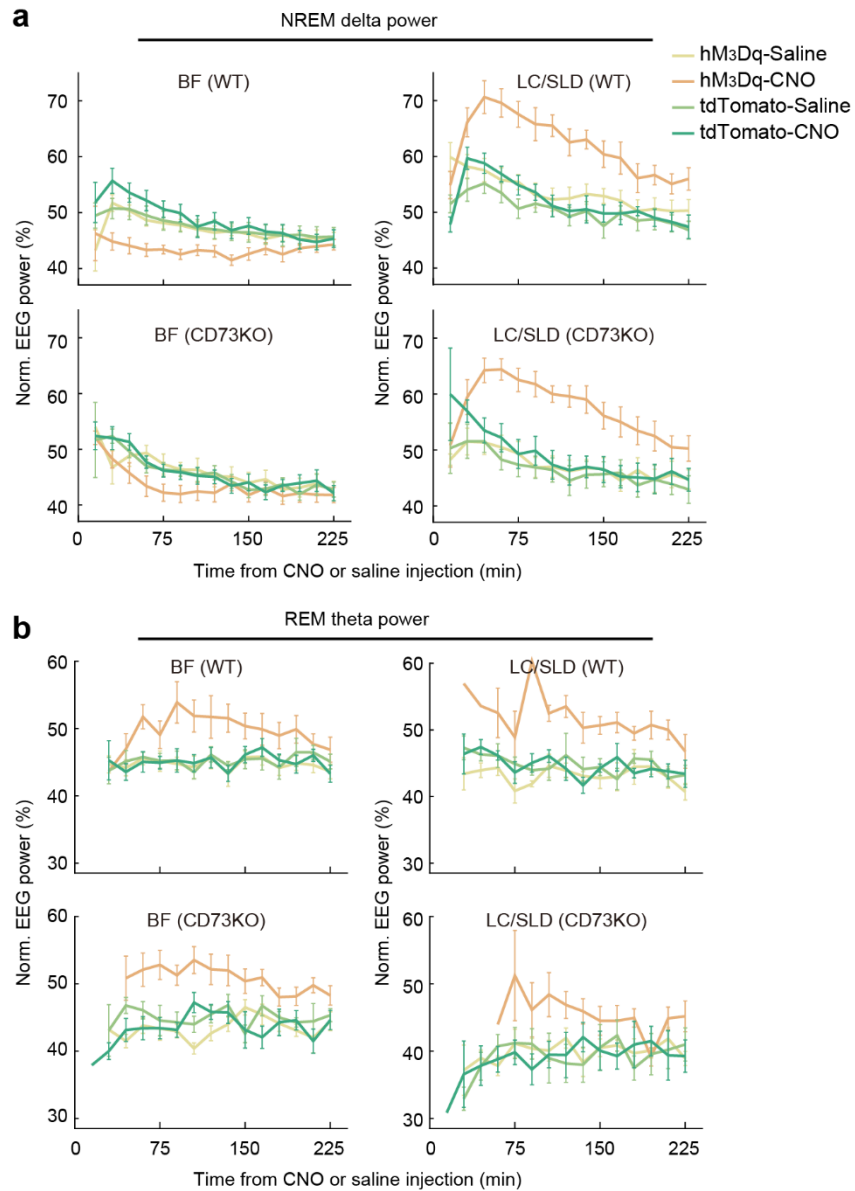

**Supplementary Fig. S19 Time course of EEG power after CNO injection (related to Fig.8)**

**a** Time course of NREM EEG delta power after CNO injection in the four sets of experiments. **b** Time course of REM EEG theta power after CNO injection in the four sets of experiments.
